# Supplementary material for: Preparation of resin-based composites containing Ce and cationic polymers with abundant promotional affinity sites for phosphate capture
Source: Royal Society of Chemistry journal article supplement (doi:10.1039/d2nj03245g), 2022-01-01
Supplement: d2nj03245g1.pdf [file d2nj03245g1.pdf]

## Supplementary Materials for

### Preparation of resin-based composites containing Ce and cations polymer with abundant promotional affinity sites for phosphate capture

Xiangcheng Shan<sup>1a</sup>, Liyu Yang<sup>1a</sup>, Huarong Yang<sup>a</sup>, Guilin Song<sup>a</sup>, Zuoyi Xiao<sup>a</sup>, Changsik Ha<sup>b</sup>, Shangru Zhai<sup>\*a</sup>, Qingda An<sup>\*a</sup>

*<sup>a</sup> Liaoning Key Lab of Lignocellulose Chemistry and BioMaterials, Liaoning Collaborative Innovation Center for Lignocellulosic Biorefinery, College of Light Industry and Chemical Engineering, Dalian Polytechnic University, Dalian 116034, China*

*<sup>b</sup> Department of Polymer Science and Engineering, Pusan National University, Republic of Korea*

<sup>1</sup> They contributed equally to this work.

#### **\*Corresponding authors.**

Tel: (+86) 411-8632-3649; Fax: (+86) 411-8632-364679

E-mail address: [zhairschem@163.com](mailto:zhairschem@163.com) (Shangru Zhai); [anqingdachem@163.com](mailto:anqingdachem@163.com) (Qingda An)

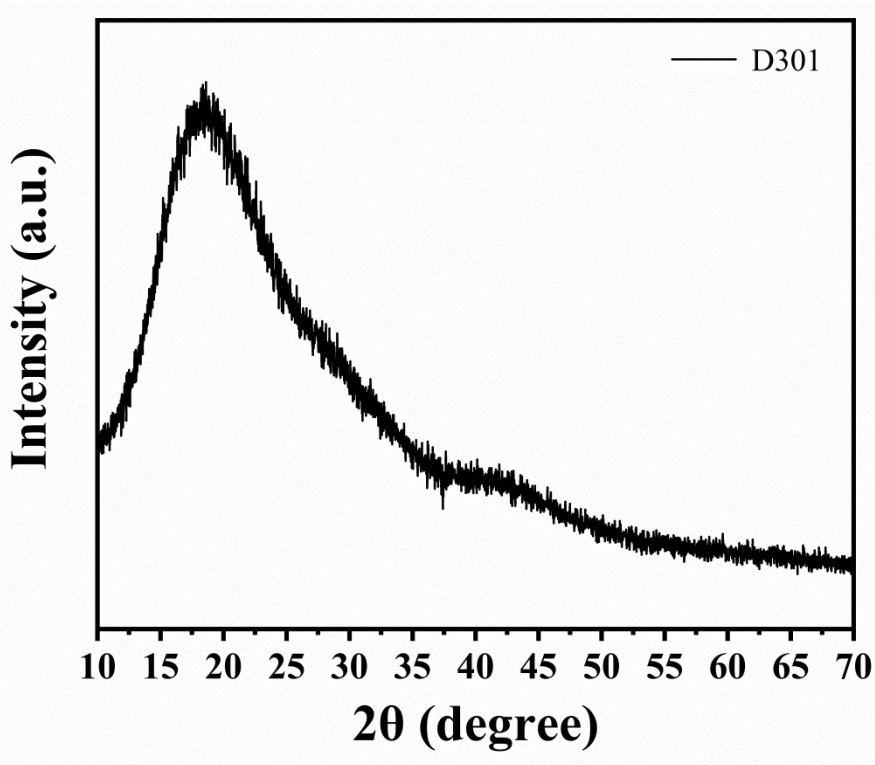

Fig. S1 XRD pattern of D301.

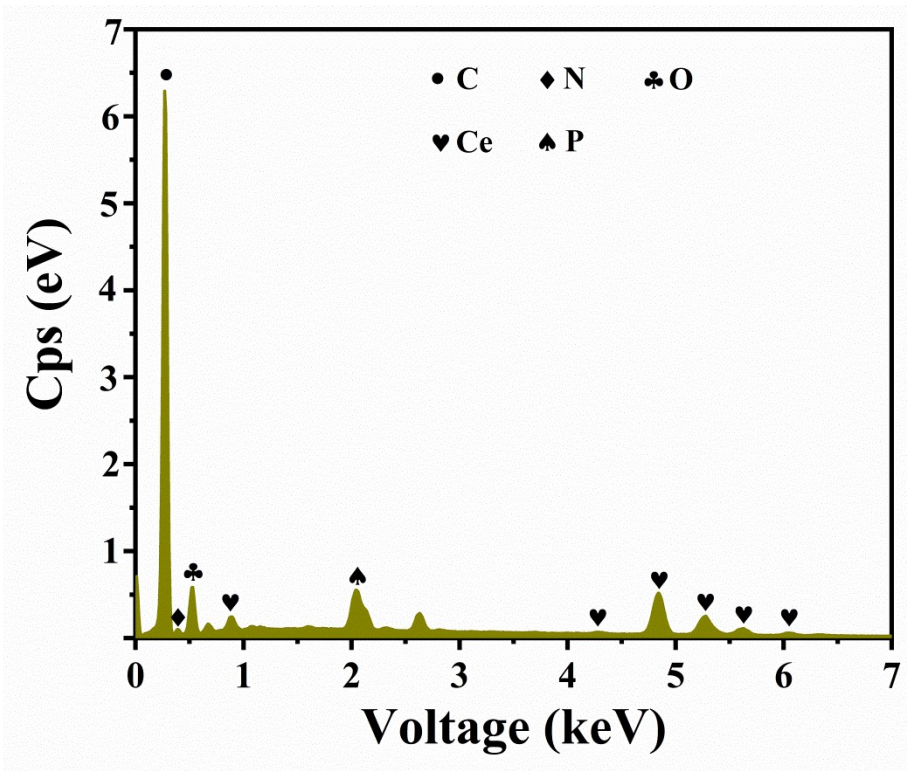

Fig. S2 EDS results of C, N, O, Ce, and P of D301-Ce<sup>+</sup> after phosphate adsorption.

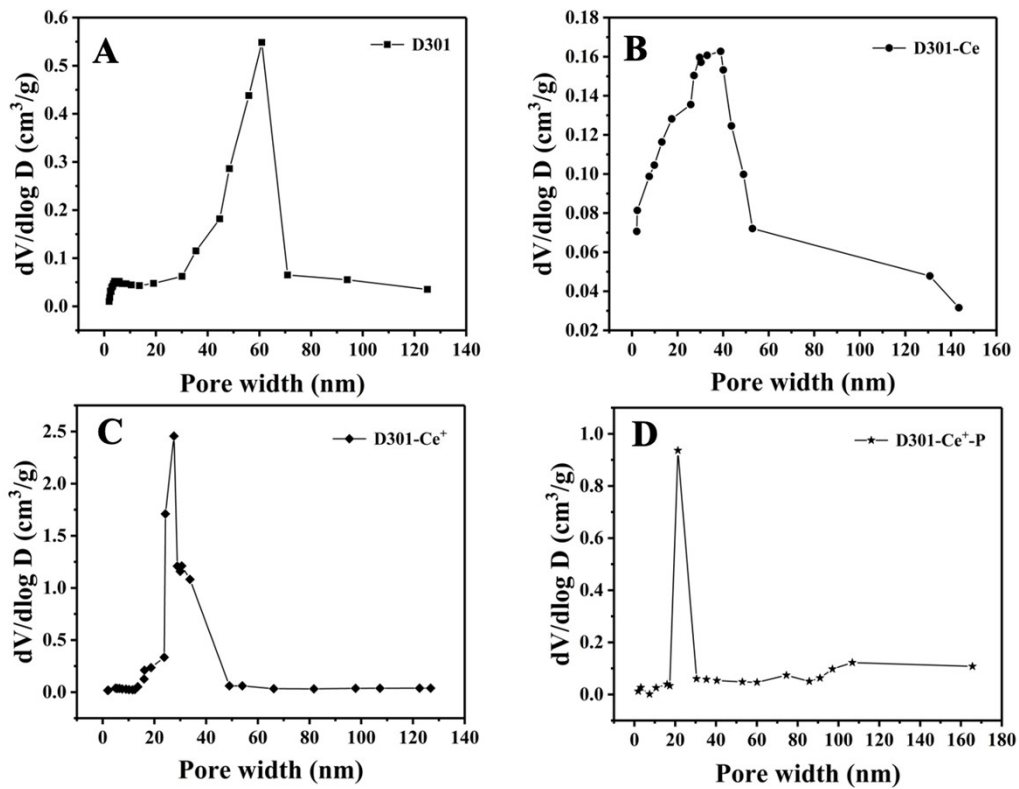

Fig. S3 The pore size distributions of (A) D301; (B) D301-Ce; (C) D301-Ce<sup>+</sup>; (D) D301-Ce<sup>+</sup>-P.

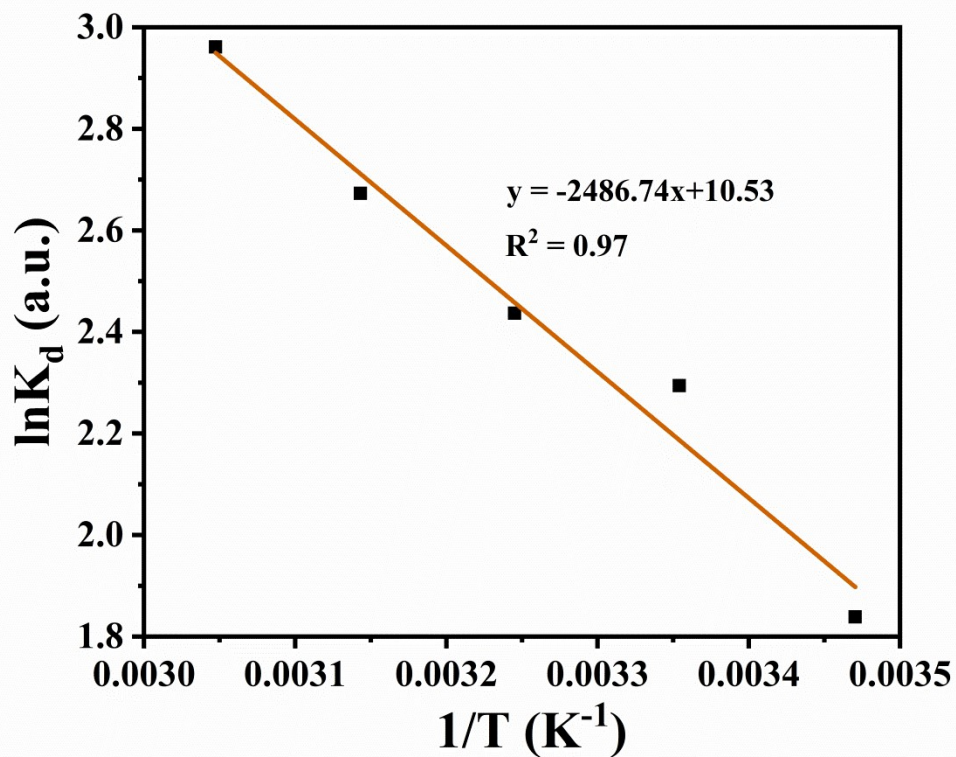

Fig. S4 Point-line graph of  $\ln K_d$  and  $1/T$  in the adsorption thermodynamic calculations.

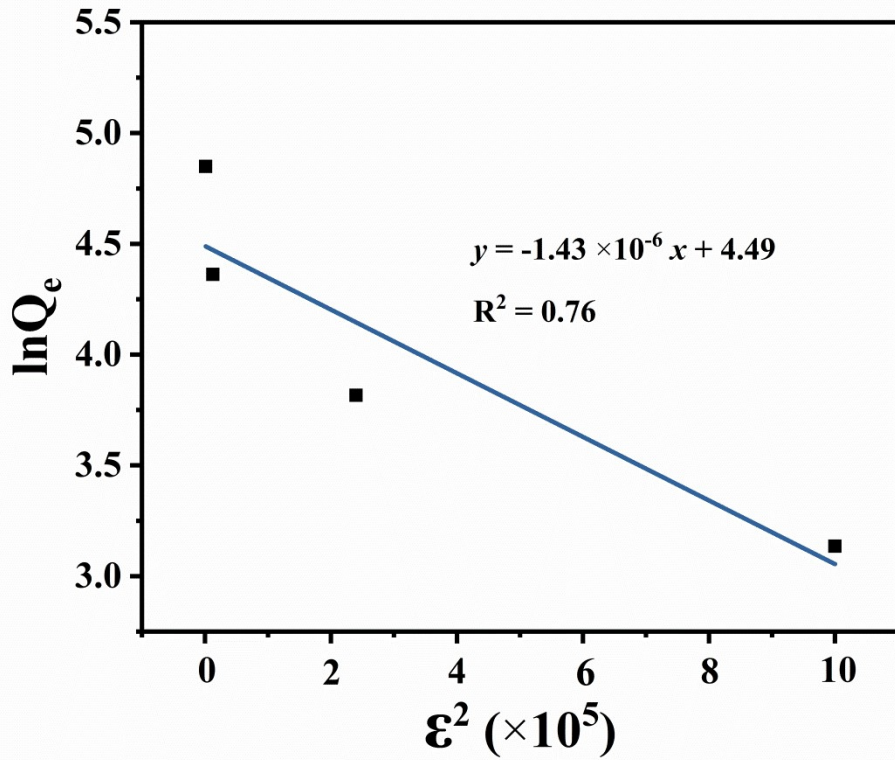

Fig. S5 Fitted point-line figure of  $\ln Q_e$  vs  $\epsilon^2$  of the D-R model.

Table. S1 Fitted parameters of the Langmuir, Freundlich, and D-R models.

| Model            | Parameter | Value                  |
|------------------|-----------|------------------------|
| Langmuir model   | $Q_m$     | 397.23                 |
|                  | $K_L$     | 0.002                  |
|                  | $R^2$     | 0.993                  |
| Freundlich model | $n$       | 1.65                   |
|                  | $K_F$     | 4.83                   |
|                  | $R^2$     | 0.974                  |
| D-R model        | $K_{DR}$  | $-1.43 \times 10^{-6}$ |
|                  | $X_m$     | 246.74                 |
|                  | $R^2$     | 0.76                   |
|                  | $E$       | 0.59                   |

Table. S2 Fitted parameters of the Pseudo-first-order, pseudo-second-order kinetic models and

diffusion-based (particle diffusion, and pore diffusion) models.

| Model               | Parameter | 25 mg P/L             | 50 mg P/L             |
|---------------------|-----------|-----------------------|-----------------------|
| Pseudo-first-order  | $Q_e$     | 21.99                 | 40.61                 |
|                     | $K_f$     | $5.71 \times 10^{-3}$ | $2.72 \times 10^{-3}$ |
|                     | $R^2$     | 0.96                  | 0.94                  |
| Pseudo-second-order | $Q_e$     | 25.00                 | 50.00                 |
|                     | $K_s$     | $6.35 \times 10^{-4}$ | $1.89 \times 10^{-4}$ |
|                     | $h$       | 0.40                  | 0.47                  |
|                     | $R^2$     | 0.99                  | 0.98                  |
| Particle diffusion  | $K_d$     | $3.81 \times 10^{-3}$ | 1.87                  |
|                     | $R^2$     | 0.21                  | 0.97                  |
| Pore diffusion      | $K_i$     | 0.02                  | 1.87                  |
|                     | $R^2$     | 0.98                  | 0.97                  |

**Table. S3** The chi-square test and the sum of the squares of errors (SSE) of pseudo-first-order and pseudo-second-order models.

| Model               | Parameter          | 25 mg P/L | 50 mg P/L |
|---------------------|--------------------|-----------|-----------|
| Pseudo-first-order  | reduced chi-square | 2.39      | 0.23      |
| Pseudo-second-order | SSE                | 19.20     | 4.80      |

**Text. S1** Details of characterization methods and instruments.

The functional groups of the samples were detected by a Fourier transform infrared spectrometer (FTIR, Japan). The crystalline phase of the samples was recorded on an X-ray diffractometer with Cu K $\alpha$  radiation ( $\lambda = 1.5418 \text{ \AA}$ ) (Shimadzu XRD-7000S, Japan). The surface micromorphology of the samples was observed by a thermal field emission scanning electron microscope system (SEM, JSM-7800F,

Japan) equipped with an X-Max50 energy spectrometer and backscattered electron diffraction analyzer (EDS) from Oxford Instruments. The samples' specific surface area and pore structure were analyzed by Brunauer-Emmett-Teller (BET) method with JW-BK222 (China) at 77 K. Thermogravimetric analysis (TGA) was conducted at the temperature ranging from 30 to 800 °C by TGA801 (USA). The samples' element composition and element valence were confirmed by X-ray photoelectron spectroscopy (XPS, ESCALAB250, USA). The surface potentials of the samples at different pH values were detected by a Zetasizer (3000HSA, Japan). The element content in samples and solutions were detected by an inductively coupled plasma mass spectrometry (ICP-MS, Thermo Scientific™, USA)

**Text. S2** Calculation equations of the thermodynamic parameters.

Several thermodynamic parameters, viz., several thermodynamic parameters, e.g., enthalpy change ( $\Delta H^\circ$ , kJ/mol), entropy change ( $\Delta S^\circ$ , J/(mol·K)) and Gibbs free energy change ( $\Delta G^\circ$ , kJ/mol) are calculated by the follow equation<sup>1</sup>:

$$K_d = \frac{Q_e}{C_e} \quad (S1)$$

$$\ln K_d = \frac{\Delta S^\circ}{R} - \frac{\Delta H^\circ}{R} \cdot \frac{1}{T} \quad (S2)$$

$$\Delta G^\circ = \Delta H^\circ - \Delta S^\circ \cdot T \quad (S3)$$

According to the Van't Hoff equation, the equilibrium constant  $K_d$  is obtained from the slope of  $Q_e$  against  $C_e$  at different temperatures. The values of  $\Delta H^\circ$  and  $\Delta S^\circ$  are determined from the slope and intercept of a plot of  $\ln K_d$  versus  $1/T$ .

**Text. S3** Equations of the Langmuir model, Freundlich model, D-R model, and the calculation

methods of related parameters.

Langmuir isotherm :

$$Q_e = \frac{Q_m K_L C_e}{1 + K_L C_e} \quad (S4)$$

Freundlich isotherm :

$$Q_e = K_F C_e^{\frac{1}{n}} \quad (S5)$$

Where  $C_e$  is the equilibrium concentration (mg/L) and  $Q_e$  is the amount adsorbed per unit weight of adsorbent.  $Q_m$  (mg P/g) represents the maximum adsorption capacity. Langmuir constant  $K_L$  (L/mg) is related to intensity of adsorption. Values of Freundlich constants viz.,  $K_F$  (mg P/g) and  $n$  are calculated from the intercepts and slopes of the linear plots of  $\log Q_e$  vs  $\log C_e$ .

D-R isotherm :

$$\ln Q_e = \ln X_m - K_{DR} \varepsilon^2 \quad (S6)$$

Where  $X_m$  is the adsorption capacity (mg P/g) and  $K_{DR}$  is the constant related to adsorption energy ( $\text{mol}^2/\text{kJ}^2$ ). The values of  $K_{DR}$  and  $X_m$  are computed from the slope and intercept of the plot  $\ln Q_e$  vs  $\varepsilon^2$ . Polanyi potential ( $\varepsilon$ ) can be calculated using the following equation:

$$\varepsilon = RT \ln \left( 1 + \frac{1}{C_e} \right) \quad (S7)$$

where T is the temperature (K) and R is the gas constant (8.314 J/(mol·K)). The values of  $K_{DR}$  are used to calculate the mean free energy  $E$  (kJ/mol) of the adsorption<sup>2</sup>.

$$E = - (2K_{DR})^{-0.5} \quad (S8)$$

**Text. S4** Equations of the pseudo-first-order, pseudo-second-order, particle diffusion, intra-particle diffusion, and the calculation methods of related parameters.

Pseudo-first-order:

$$\log(Q_e - Q_t) = \log Q_e - \frac{K_f}{2.303}t \quad (\text{S9})$$

where  $Q_e$  and  $Q_t$  are the adsorption capacity at equilibrium and at time  $t$ , respectively (mg P/g),  $K_f$  is the rate constant of pseudo-first order adsorption ( $\text{min}^{-1}$ ). Linear plots of  $\log(Q_e - Q_t)$  against  $t$  gives a straight line that indicates the applicability of pseudo-first-order model.  $K_f$  and  $Q_e$  can be determined from the slope and intercept.

Pseudo-second-order:

$$\frac{t}{Q_t} = \frac{1}{h} + \frac{t}{Q_e} \quad (\text{S10})$$

in which  $Q_t = \frac{Q_e^2 K_s \cdot t}{1 + Q_e K_s \cdot t}$  is the amount of anion on the surface of the sorbents at any time,  $t$  (mg P/g),  $K_s$  is the pseudo-second-order rate constant ( $\text{g}/(\text{mg} \cdot \text{min})$ ),  $Q_e$  is the amount of phosphate adsorbed at equilibrium (mg P/g), and the initial adsorption rate,  $h = K_s Q_e^2$ . The value of  $Q_e$  (1/slope),  $K_s$  (slope<sup>2</sup>/intercept) and  $h$  (1/intercept) of the pseudo-second-order equation can be found out experimentally by plotting  $t/Q_t$  against  $t$ .

Particle diffusion :

$$\ln\left(\left|1 - \frac{C_t}{C_e}\right|\right) = -K_p t \quad (\text{S11})$$



where  $K_p$  is the particle rate constant ( $\text{min}^{-1}$ ). The value of particle rate constant is obtained by the slope of  $\ln(1 - C_t/C_e)$  against  $t$ .

Intra-particle diffusion :

$$Q_t = K_i t^{1/2} \quad (\text{S12})$$

where  $K_i$  is the intra-particle diffusion coefficient ( $\text{mg P/g min}^{1/2}$ ). The slope of the plot of  $Q_t$  against  $t^{1/2}$  will give the value of the intra-particle diffusion coefficient<sup>3</sup>.

**Text. S5** The calculation equations of parameters on the adsorption experiment of adsorbent in simulated dynamic wastewater, and details of the Thomas and Adams-Bohart models.

The effluent volume ( $V_E$ , mL), total amount of phosphate adsorbed ( $Q_{\text{total}}$ , mg), empty bed contact time (EBCT, min), adsorbed phosphate amount at equilibrium ( $Q_e$ , mg P/g) in the fixed-bed column experiments were calculated by the following equations:

$$V_E = vt_e \quad (\text{S13})$$

$$Q_{\text{total}} = \int_0^{V_E} (c_0 - c_t) dV \quad (\text{S14})$$

$$EBCT = \frac{\text{bed volume}}{v} \quad (\text{S15})$$

$$Q_e = \frac{Q_{\text{total}}}{m} \quad (\text{S16})$$

in which  $v$  (mL/min) and  $t_e$  (min) are the flow rate through the column and the time of the breakthrough point,  $m$  is the mass of D301 or D301-Ce<sup>+</sup>.

The Thomas model assumes that the adsorption process is controlled by mass transfer between phases, the formula is depicted as follow:

$$\frac{c_t}{c_0} = 1 + e^{-\frac{1}{v} \left( \frac{K_T Q_0 m}{v} - K_T c_0 t \right)} \quad (\text{S17})$$

where  $Q_0$  (mg P/g) is adsorption capacity,  $K_T$  (L/(min·mg)) is Thomas constant,  $v$  (mL/min) is flow rate,  $c_0$  and  $c_t$  is the primeval concentration of phosphate and concentration of the effluent solution at time  $t$  (min),  $m$  (g) is the mass of D301 or D301-Ce<sup>+</sup>.

The Adams-Bohart model is usually applied to describe the front part of breakthrough curve, the formula is depicted as follow:

$$\frac{c_t}{c_0} = e^{-K_{AB} c_0 t - K_{AB} N_0 \frac{Z}{F}} \quad (\text{S18})$$

where  $N_0$  (mg P/L) is the saturated concentration,  $K_{AB}$  (L/(min·mg)) represents the dynamic constant,  $Z$  (cm) is the height of bed column and  $F$  (cm/min) is the superficial velocity<sup>4</sup>.

1. M. Liu, S. Li, N. Tang, Y. Wang, X. Yang and S. Wang, *Journal of Cleaner Production*, 2020, **265**.
2. A. Sowmya and S. Meenakshi, *Int J Biol Macromol*, 2014, **64**, 224-232.
3. S. M. Appunni Sowmya, *Chemical Engineering Journal*, 2014, **257**, 45-55.
4. Y.-Z. Yan, Q.-D. An, Z.-Y. Xiao, S.-R. Zhai, B. Zhai and Z. Shi, *Journal of Materials Chemistry A*, 2017, **5**, 17073-17087.
